# Supplementary material for: Superfast Capture of Iodine from Air, Water, and Organic Solvent by Potential Dithiocarbamate-Based Organic Polymer
Source: MDPI journal article supplement (doi:10.3390/ijms24021466), 2023-01-11
Supplement: s1 [file s1]

# Superfast capturing of iodine from air, water, and organic solvent by potential dithiocarbamate-based organic polymer

Liya Thurakkal<sup>1</sup>, Subba Rao Cheekatla<sup>1</sup> and Mintu Porel<sup>1,2\*</sup>

<sup>1</sup>Department of Chemistry, Indian Institute of Technology Palakkad, Palakkad 678557, India

<sup>2</sup>Environmental Sciences and Sustainable Engineering Center, Indian Institute of Technology Palakkad, Palakkad 678557, India

\*Correspondence: [mintu@iitpkd.ac.in](mailto:mintu@iitpkd.ac.in)

## Table of Contents

|                                                                                                                                                                                                                                                                              |    |
|------------------------------------------------------------------------------------------------------------------------------------------------------------------------------------------------------------------------------------------------------------------------------|----|
| 1. Figure S1. UV-visible spectra of I <sub>2</sub> in cyclohexane with the interaction of DTC-OPs.....                                                                                                                                                                       | S2 |
| 2. Figure S2. a) Nitrogen sorption isotherm of DTC-OP1 at 77 K. The solid shapes represent adsorption, and the hollow shapes represent desorption. b) NLDFT pore size distribution of DTC-OP1.....                                                                           | S2 |
| 3. Figure S3. a) Nitrogen sorption isotherm of DTC-OP2 at 77 K. The solid shapes represent adsorption, and the hollow shapes represent desorption. b) NLDFT pore size distribution of DTC-OP2.....                                                                           | S2 |
| 4. Figure S4. a) Nitrogen sorption isotherm of DTC-OP3 at 77 K. The solid shapes represent adsorption, and the hollow shapes represent desorption. b) NLDFT pore size distribution of DTC-OP3.....                                                                           | S3 |
| 5. Figure S5. a) Nitrogen sorption isotherm of DTC-OP4 at 77 K. The solid shapes represent adsorption, and the hollow shapes represent desorption. b) NLDFT pore size distribution of DTC-OP4.....                                                                           | S3 |
| 6. Table S1. Porosity properties of DTC-OP. (Specific surface area was calculated from the nitrogen adsorption isotherm using the BET method in the relative pressure (P/P <sub>0</sub> ) range from 0.1 to 0.3, pore volume was calculated at P/P <sub>0</sub> = 0.99)..... | S3 |
| 7. Figure S6. Release of adsorbed iodine to ethanol from (a) DTC-OP1 and (b) DTC-OP2.....                                                                                                                                                                                    | S4 |
| 8. Figure S7. Langmuir adsorption isotherm for the adsorption of triiodide ions from water by (a) DTC-OP2 and (b) DTC-OP3.....                                                                                                                                               | S4 |
| 9. Figure S8. UV-vis spectrum for the kinetics of removal of triiodide ions from water by (a) DTC-OP2 and (b) DTC-OP3.....                                                                                                                                                   | S4 |
| 10. Figure S9. pH dependent studies on the adsorption of I <sub>3</sub> <sup>-</sup> from water by (a) DTC-OP2 (b) DTC-OP3 and (c) % removal at various pH.....                                                                                                              | S5 |

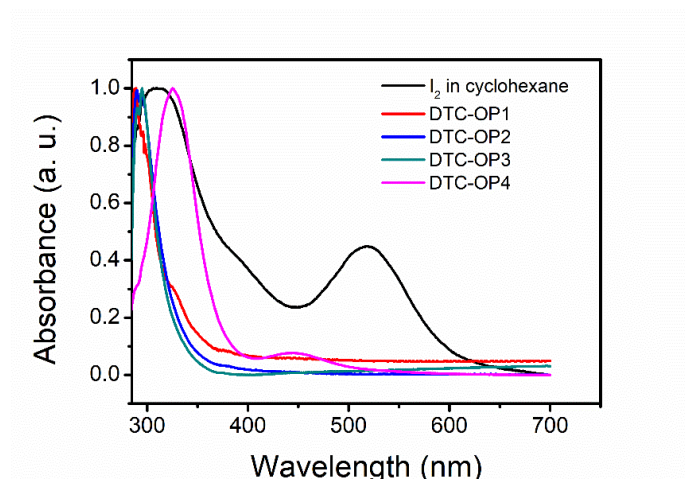

**Figure S1.** UV-visible spectra of  $I_2$  in cyclohexane with the interaction of DTC-POPs.

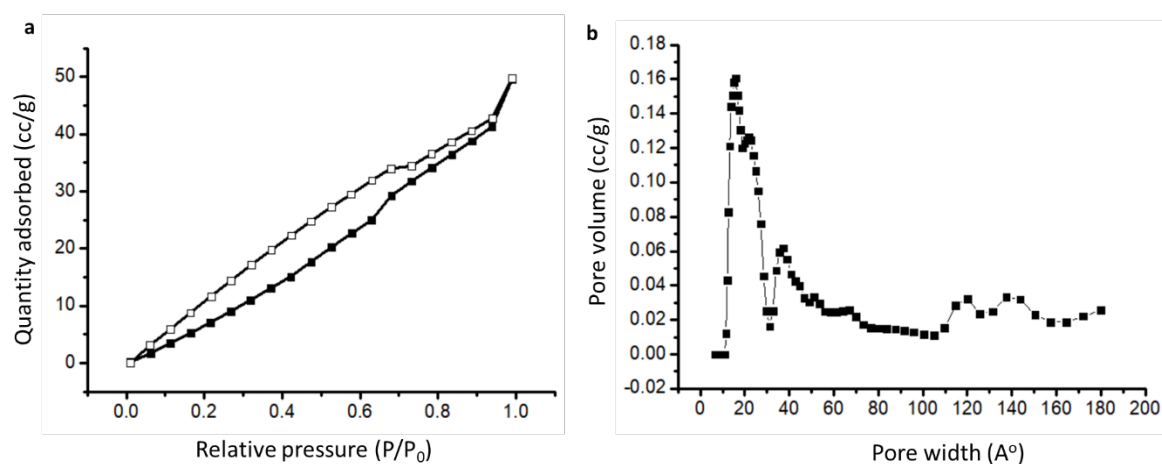

**Figure S2.** **a)** Nitrogen sorption isotherm of DTC-OP1 at 77 K. The solid shapes represent adsorption, and the hollow shapes represent desorption. **b)** NLDFT pore size distribution of DTC-OP1.

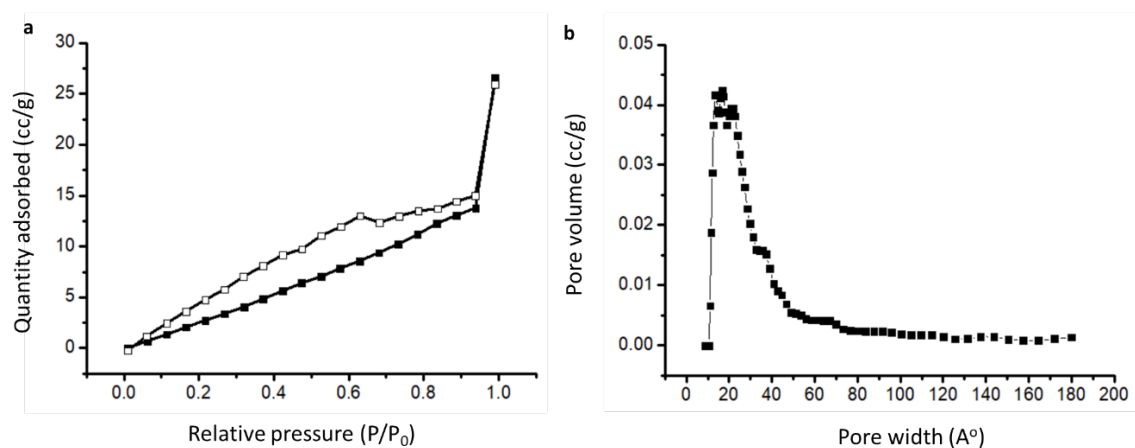

**Figure S3.** **a)** Nitrogen sorption isotherm of DTC-OP2 at 77 K. The solid shapes represent adsorption, and the hollow shapes represent desorption. **b)** NLDFT pore size distribution of DTC-OP2.

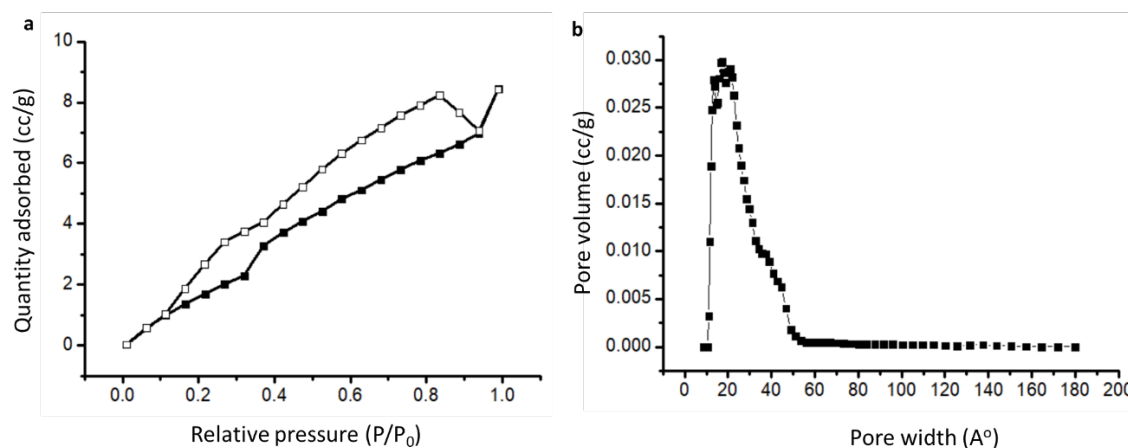

**Figure S4. a)** Nitrogen sorption isotherm of DTC-OP3 at 77 K. The solid shapes represent adsorption, and the hollow shapes represent desorption. **b)** NLDFT pore size distribution of DTC-OP3.

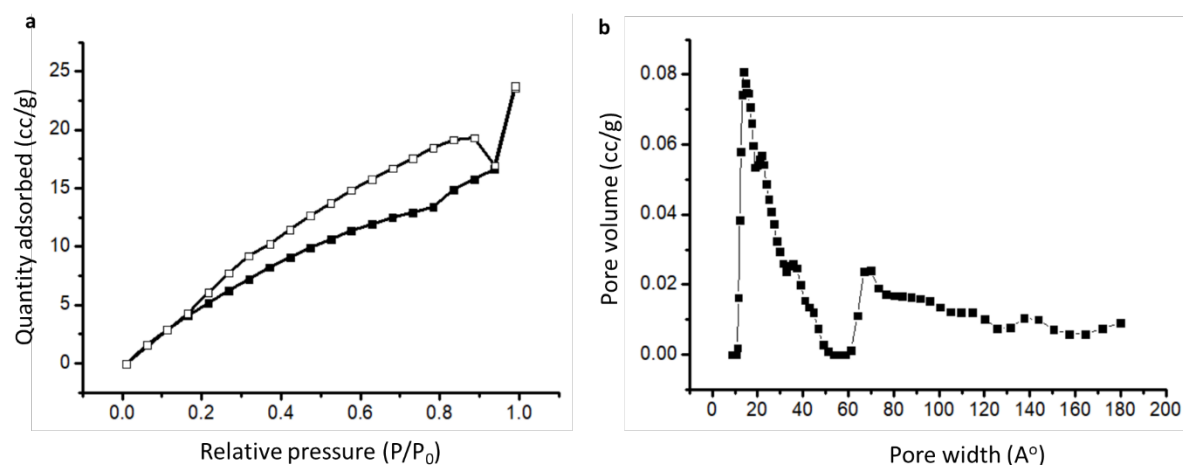

**Figure S5. a)** Nitrogen sorption isotherm of DTC-OP4 at 77 K. The solid shapes represent adsorption, and the hollow shapes represent desorption. **b)** NLDFT pore size distribution of DTC-OP4

**Table S1.** Porosity properties of DTC-OP. (Specific surface area was calculated from the nitrogen adsorption isotherm using the BET method in the relative pressure ( $P/P_0$ ) range from 0.1 to 0.3, pore volume was calculated at  $P/P_0 = 0.99$ ).

| Material | BET surface area<br>( $\text{m}^2/\text{g}$ ) | Pore volume (cc/g) | Pore size (nm) |
|----------|-----------------------------------------------|--------------------|----------------|
| DTC-OP1  | 90.119                                        | 0.0719             | 1.7055         |
| DTC-OP2  | 27.198                                        | 0.0414             | 3.114          |
| DTC-OP3  | 10.406                                        | 0.0137             | 2.508          |

|                |        |        |       |
|----------------|--------|--------|-------|
| <b>DTC-OP4</b> | 34.476 | 0.0375 | 2.173 |
|----------------|--------|--------|-------|

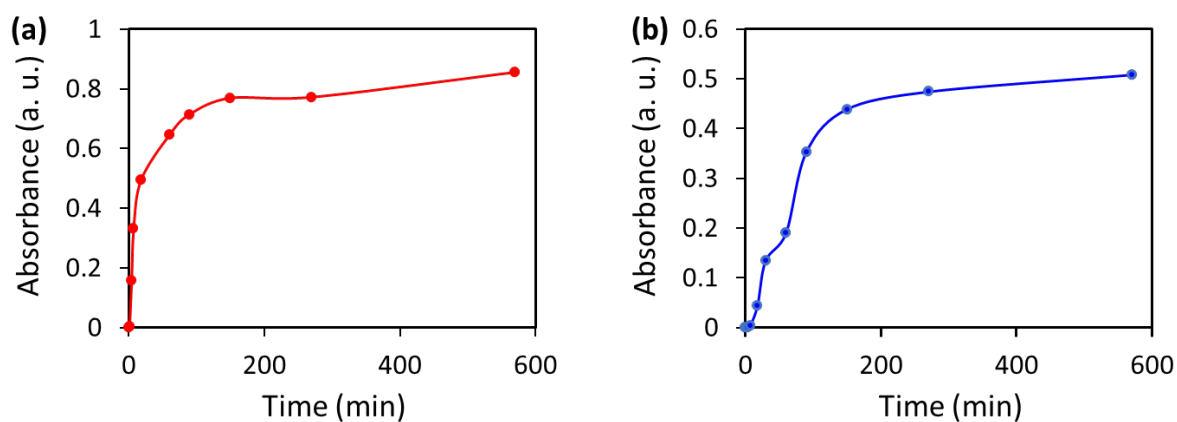

**Figure S6.** Release of adsorbed iodine to ethanol from (a) DTC-OP2 and (b) DTC-OP3

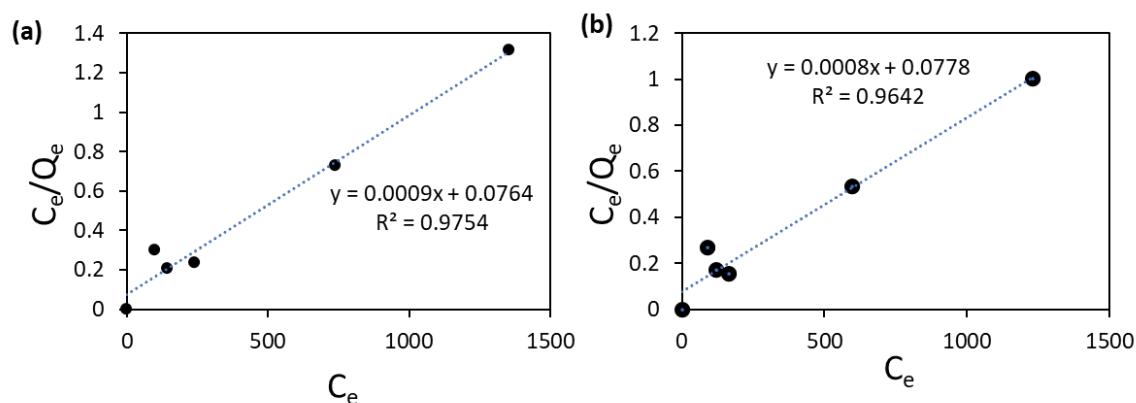

**Figure S7.** Langmuir adsorption isotherm for the adsorption of triiodide ions from water by (a) DTC-OP2 and (b) DTC-OP3

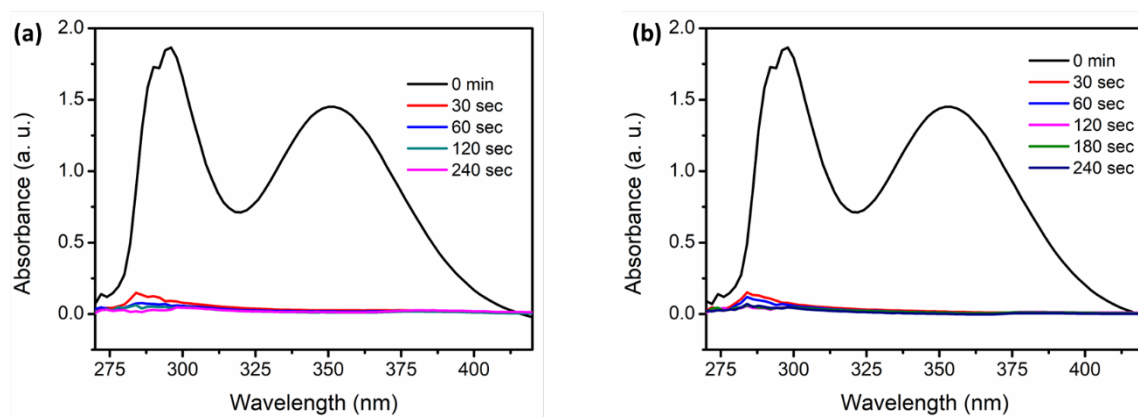

**Figure S8.** UV-vis spectrum for the kinetics of removal of triiodide ions from water by (a) DTC-OP2 and (b) DTC-OP3

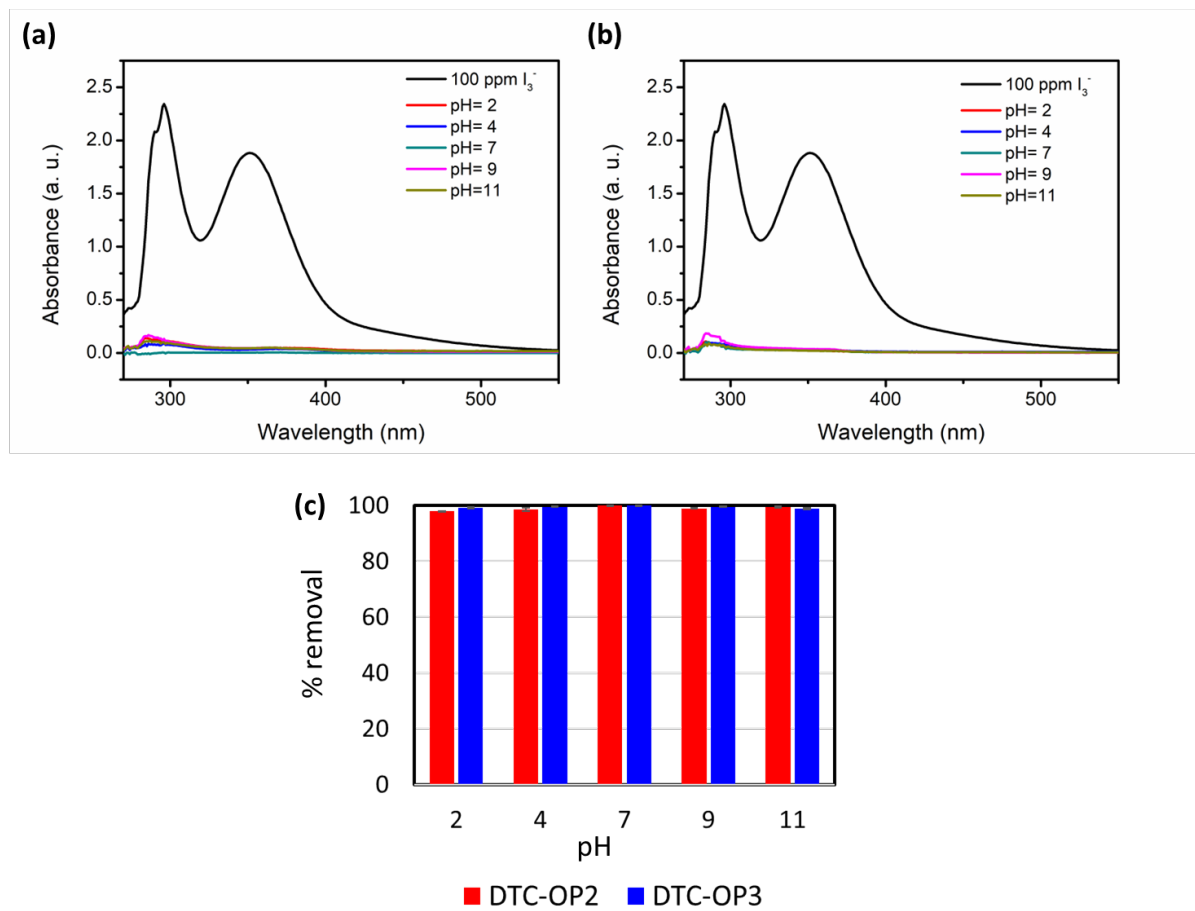

**Figure S9.** pH dependent studies on the adsorption of  $I_3^-$  from water by (a) DTC-OP2 (b) DTC-OP3 and (c) % removal at various pH
